# Supplementary material for: Increased survival disparities among children and adolescents & young adults with acute myeloid leukemia: A Dutch population‐based study
Source: PubMed Central journal article supplement — Int J Cancer. 2021 Dec 16;150(7):1101–12. doi: 10.1002/ijc.33878 (PMC9299619; doi:10.1002/ijc.33878), 2021-12-16
Supplement: IJC-150-1101-s001.pdf [file IJC-150-1101-s001.pdf]

## **Increased survival disparities among children and adolescents & young adults with acute myeloid leukemia: a Dutch population-based study**

Maya Schulpen, Bianca F. Goemans, Gertjan J.L. Kaspers, Marc H.G.P. Raaijmakers, C. Michel Zwaan, Henrike E. Karim-Kos

**Supplementary Table S1** Age-specific 5-year relative survival of children and AYAs (0-39 years) diagnosed with AML (excl. APL and ML-DS) in the Netherlands between 1990-2015, overall and by period of diagnosis

**Supplementary Table S2** Multivariable associations of age with excess mortality due to AML (excl. APL and ML-DS) in children and AYAs (0-39 years) until 5 years of follow-up stratified by period of diagnosis, the Netherlands, 1990-2015

**Supplementary Table S3** Univariable and multivariable associations of alternative categories of age with excess mortality due to AML (excl. APL and ML-DS) in children and AYAs (0-39 years) until 5 years of follow-up, the Netherlands, 1990-2015

**Supplementary Table S4** Five-year and 10-year relative survival of children (0-17 years) and AYAs (18-39 years) diagnosed with APL in the Netherlands between 1990-2015, overall and by subgroup

**Supplementary Table S1** Age-specific 5-year relative survival<sup>a</sup> of children and AYAs (0-39 years) diagnosed with AML (excl. APL and ML-DS) in the Netherlands between 1990-2015, overall and by period of diagnosis

|             | 5-year relative survival |           |           |           |     |           |     |           |     |           |      |                    |
|-------------|--------------------------|-----------|-----------|-----------|-----|-----------|-----|-----------|-----|-----------|------|--------------------|
|             | 1990-1999                | 2000-2009 | 2010-2015 | 1990-2015 |     | 1990-1999 |     | 2000-2009 |     | 2010-2015 |      | P <sub>trend</sub> |
|             | N                        | N         | N         | %         | SE  | %         | SE  | %         | SE  | %         | SE   |                    |
| Age (years) |                          |           |           |           |     |           |     |           |     |           |      |                    |
| 0           | 27                       | 31        | 18        | 47.6      | 5.8 | 29.8      | 8.8 | 55.1      | 9.0 | 61.4      | 11.5 | <b>0.01</b>        |
| 1-9         | 110                      | 117       | 64        | 60.8      | 2.9 | 53.7      | 4.8 | 54.7      | 4.6 | 84.3      | 4.6  | <b>0.001</b>       |
| 10-17       | 92                       | 96        | 57        | 56.6      | 3.2 | 48.5      | 5.2 | 58.4      | 5.0 | 66.7      | 6.2  | <b>0.01</b>        |
| 18-29       | 226                      | 177       | 110       | 42.9      | 2.2 | 35.5      | 3.2 | 46.9      | 3.8 | 51.9      | 4.8  | <b>0.002</b>       |
| 30-39       | 296                      | 263       | 137       | 42.9      | 1.9 | 35.3      | 2.8 | 44.3      | 3.1 | 56.7      | 4.3  | <b>&lt;0.001</b>   |
| Age (years) |                          |           |           |           |     |           |     |           |     |           |      |                    |
| 0-14        | 193                      | 208       | 119       | 57.9      | 2.2 | 49.8      | 3.6 | 55.8      | 3.4 | 74.8      | 4.0  | <b>&lt;0.001</b>   |
| 15-19       | 69                       | 64        | 36        | 50.1      | 3.9 | 38.4      | 5.9 | 57.9      | 6.2 | 58.4      | 8.2  | <b>0.01</b>        |
| 20-29       | 193                      | 149       | 94        | 42.7      | 2.4 | 35.8      | 3.5 | 45.0      | 4.1 | 53.3      | 5.2  | <b>0.003</b>       |
| 30-39       | 296                      | 263       | 137       | 42.9      | 1.9 | 35.3      | 2.8 | 44.3      | 3.1 | 56.7      | 4.3  | <b>&lt;0.001</b>   |

AYAs adolescents and young adults, AML acute myeloid leukemia, APL acute promyelocytic leukemia, ML-DS myeloid leukemia associated with Down Syndrome, SE standard error.

<sup>a</sup> Expected probabilities of survival were estimated using the Ederer II method.

**Supplementary Table S2** Multivariable associations<sup>a</sup> of age with excess mortality due to AML (excl. APL and ML-DS) in children and AYAs (0-39 years) until 5 years of follow-up stratified by period of diagnosis, the Netherlands, 1990-2015

| Variable              | Until 5 years of follow-up (1990-2015) |            |             |                  |                      |            |             |              |                      |            |              |                  |
|-----------------------|----------------------------------------|------------|-------------|------------------|----------------------|------------|-------------|--------------|----------------------|------------|--------------|------------------|
|                       | 1990-1999                              |            |             |                  | 2000-2009            |            |             |              | 2010-2015            |            |              |                  |
|                       | N <sub>at risk</sub>                   | Excess HR  | 95% CI      | p-value          | N <sub>at risk</sub> | Excess HR  | 95% CI      | p-value      | N <sub>at risk</sub> | Excess HR  | 95% CI       | p-value          |
| Age                   |                                        |            |             |                  |                      |            |             |              |                      |            |              |                  |
| Children (0-17 years) | 229                                    | 1.00 (ref) |             |                  | 244                  | 1.00 (ref) |             |              | 139                  | 1.00 (ref) |              |                  |
| AYAs (18-39 years)    | 522                                    | 1.41       | (1.14-1.75) | <b>0.002</b>     | 440                  | 1.49       | (1.16-1.91) | <b>0.002</b> | 247                  | 2.62       | (1.66-4.14)  | <b>&lt;0.001</b> |
| Age (years)           |                                        |            |             |                  |                      |            |             |              |                      |            |              |                  |
| 0                     | 27                                     | 2.74       | (1.61-4.66) | <b>&lt;0.001</b> | 31                   | 1.11       | (0.61-2.01) | 0.73         | 18                   | 3.01       | (1.13-7.98)  | <b>0.03</b>      |
| 1-9                   | 110                                    | 1.00 (ref) |             |                  | 117                  | 1.00 (ref) |             |              | 64                   | 1.00 (ref) |              |                  |
| 10-17                 | 92                                     | 1.40       | (0.94-2.09) | 0.10             | 96                   | 0.89       | (0.59-1.34) | 0.58         | 57                   | 2.44       | (1.13-5.26)  | <b>0.02</b>      |
| 18-29                 | 226                                    | 1.78       | (1.28-2.46) | <b>0.001</b>     | 177                  | 1.32       | (0.93-1.88) | 0.12         | 110                  | 5.03       | (2.45-10.33) | <b>&lt;0.001</b> |
| 30-39                 | 296                                    | 1.84       | (1.34-2.52) | <b>&lt;0.001</b> | 263                  | 1.53       | (1.09-2.14) | <b>0.01</b>  | 137                  | 4.42       | (2.11-9.23)  | <b>&lt;0.001</b> |

AML acute myeloid leukemia, APL acute promyelocytic leukemia, ML-DS myeloid leukemia associated with Down Syndrome, AYAs adolescents and young adults, excess HR excess hazard ratio, CI confidence interval, SCT stem cell transplantation.

<sup>a</sup> Adjusted for follow-up time (years), sex (male, female), SCT (no, yes), and site of primary treatment (non-academic hospital, academic hospital).

**Supplementary Table S3** Univariable and multivariable associations<sup>a</sup> of alternative categories of age with excess mortality due to AML (excl. APL and ML-DS) in children and AYAs (0-39 years) until 5 years of follow-up, the Netherlands, 1990-2015

| Variable    | N <sub>at risk</sub> | Until 5 years of follow-up (1990-2015) |             |                  |                         |             |                  |                         |             |                  |
|-------------|----------------------|----------------------------------------|-------------|------------------|-------------------------|-------------|------------------|-------------------------|-------------|------------------|
|             |                      | Univariable                            |             |                  | Adjusted 1 <sup>b</sup> |             |                  | Adjusted 2 <sup>c</sup> |             |                  |
|             |                      | Excess HR                              | 95% CI      | p-value          | Excess HR               | 95% CI      | p-value          | Excess HR               | 95% CI      | p-value          |
| Age (years) |                      |                                        |             |                  |                         |             |                  |                         |             |                  |
| 0-14        | 520                  | 1.00 (ref)                             |             |                  | 1.00 (ref)              |             |                  | 1.00 (ref)              |             |                  |
| 15-19       | 169                  | 1.25                                   | (0.97-1.60) | 0.09             | 1.24                    | (0.97-1.60) | 0.09             | 1.30                    | (1.01-1.68) | <b>0.04</b>      |
| 20-29       | 436                  | 1.50                                   | (1.25-1.80) | <b>&lt;0.001</b> | 1.47                    | (1.23-1.77) | <b>&lt;0.001</b> | 1.61                    | (1.33-1.94) | <b>&lt;0.001</b> |
| 30-39       | 696                  | 1.53                                   | (1.30-1.80) | <b>&lt;0.001</b> | 1.51                    | (1.28-1.78) | <b>&lt;0.001</b> | 1.68                    | (1.41-2.00) | <b>&lt;0.001</b> |

AML acute myeloid leukemia, APL acute promyelocytic leukemia, ML-DS myeloid leukemia associated with Down Syndrome, AYAs adolescents and young adults, excess HR excess hazard ratio, CI confidence interval, SCT stem cell transplantation.

<sup>a</sup> All models were adjusted for follow-up time (years).

<sup>b</sup> Additionally adjusted for sex (male, female) and period of diagnosis (1990-1999, 2000-2009, 2010-2015).

<sup>c</sup> Additionally adjusted for sex (male, female), period of diagnosis (1990-1999, 2000-2009, 2010-2015), SCT (no, yes), and site of primary treatment (non-academic hospital, academic hospital).

**Supplementary Table S4** Five-year and 10-year relative survival<sup>a</sup> of children (0-17 years) and AYAs (18-39 years) diagnosed with APL in the Netherlands between 1990-2015, overall and by subgroup

|                           | 5-year relative survival (1990-2015) |              |      |                       |      |      |                    |             |     | 10-year relative survival (1990-2009) <sup>b</sup> |      |      |                       |      |      |                    |      |     |
|---------------------------|--------------------------------------|--------------|------|-----------------------|------|------|--------------------|-------------|-----|----------------------------------------------------|------|------|-----------------------|------|------|--------------------|------|-----|
|                           | Total                                |              |      | Children (0-17 years) |      |      | AYAs (18-39 years) |             |     | Total                                              |      |      | Children (0-17 years) |      |      | AYAs (18-39 years) |      |     |
|                           | N                                    | %            | SE   | N                     | %    | SE   | N                  | %           | SE  | N                                                  | %    | SE   | N                     | %    | SE   | N                  | %    | SE  |
| Overall                   | 202                                  | 80.8         | 2.8  | 34                    | 76.6 | 7.3  | 168                | 81.7        | 3.0 | 146                                                | 73.7 | 3.7  | 28                    | 64.5 | 9.1  | 118                | 75.9 | 4.0 |
| Sex                       |                                      |              |      |                       |      |      |                    |             |     |                                                    |      |      |                       |      |      |                    |      |     |
| Male                      | 83                                   | 83.3         | 4.1  | 18                    | 83.4 | 8.8  | 65                 | 83.2        | 4.7 | 60                                                 | 75.5 | 5.6  | 15                    | 66.9 | 12.2 | 45                 | 78.4 | 6.3 |
| Female                    | 119                                  | 79.1         | 3.8  | 16                    | 68.8 | 11.6 | 103                | 80.7        | 3.9 | 86                                                 | 72.5 | 4.9  | 13                    | 61.6 | 13.5 | 73                 | 74.4 | 5.2 |
| Period of diagnosis       |                                      |              |      |                       |      |      |                    |             |     |                                                    |      |      |                       |      |      |                    |      |     |
| 1990-1999                 | 74                                   | 73.2         | 5.2  | 15                    | 73.4 | 11.4 | 59                 | 73.2        | 5.8 | 74                                                 | 70.8 | 5.4  | 15                    | 66.8 | 12.2 | 59                 | 71.8 | 6.0 |
| 2000-2009                 | 72                                   | 77.9         | 4.9  | 13                    | 69.3 | 12.8 | 59                 | 79.8        | 5.3 | 72                                                 | 76.7 | 5.1  | 13                    | 61.7 | 13.5 | 59                 | 80.0 | 5.3 |
| 2010-2015                 | 56                                   | 94.8         | 3.0  | 6                     | NA   | NA   | 50                 | 94.2        | 3.4 | NA                                                 | NA   | NA   | NA                    | NA   | NA   | NA                 | NA   | NA  |
| P <sub>trend</sub>        |                                      | <b>0.004</b> |      |                       | 0.34 |      |                    | <b>0.01</b> |     |                                                    | 0.44 |      |                       | 0.75 |      |                    | 0.32 |     |
| Site of primary treatment |                                      |              |      |                       |      |      |                    |             |     |                                                    |      |      |                       |      |      |                    |      |     |
| Non-academic hospital     | 54                                   | 70.2         | 6.3  | 5                     | NA   | NA   | 49                 | 71.3        | 6.6 | 40                                                 | 65.2 | 7.7  | 4                     | NA   | NA   | 36                 | 66.9 | 8.0 |
| Academic hospital         | 148                                  | 84.7         | 3.0  | 29                    | 79.4 | 7.5  | 119                | 86.0        | 3.2 | 106                                                | 76.9 | 4.2  | 24                    | 66.8 | 9.6  | 82                 | 79.9 | 4.5 |
| Therapy                   |                                      |              |      |                       |      |      |                    |             |     |                                                    |      |      |                       |      |      |                    |      |     |
| Chemo                     | 190                                  | 84.9         | 2.6  | 33                    | 78.9 | 7.1  | 157                | 86.2        | 2.8 | 135                                                | 78.2 | 3.6  | 27                    | 66.8 | 9.1  | 108                | 81.1 | 3.9 |
| SCT                       | 12                                   | 75.2         | 12.5 | 5                     | NA   | NA   | 7                  | NA          | NA  | 12                                                 | 67.2 | 13.7 | 5                     | NA   | NA   | 7                  | NA   | NA  |

AYAs adolescents and young adults, APL acute promyelocytic leukemia, SE standard error, SCT stem cell transplantation.

NA: N at risk <10

<sup>a</sup> Expected probabilities of survival were estimated using the Ederer II method.

<sup>b</sup> 10-year relative survival could not be estimated for the most recent period 2010-2015 due to incomplete follow-up.
